# Supplementary material
Source: publisher site journal article supplement (https://www.spandidos-publications.com/5172/downloadSupplementary)

Figure S1. Relative protein expression levels of menin and IQGAP1 in 108 gastric cancer and paired normal tissues. The distribution of protein expression in 108 tissues is shown as a scatter plot. The median of the gray scale bands of menin protein/ $\beta$ -actin was 0.315 in 108 gastric cancer tissues and 0.800 in paired normal tissues. The median of the gray scale bands of IQGAP1 protein/ $\beta$ -actin was 0.852 in 108 gastric cancer tissues and 0.371 in paired normal tissues. IQGAP1, IQ motif-containing GTPase-activating protein 1.

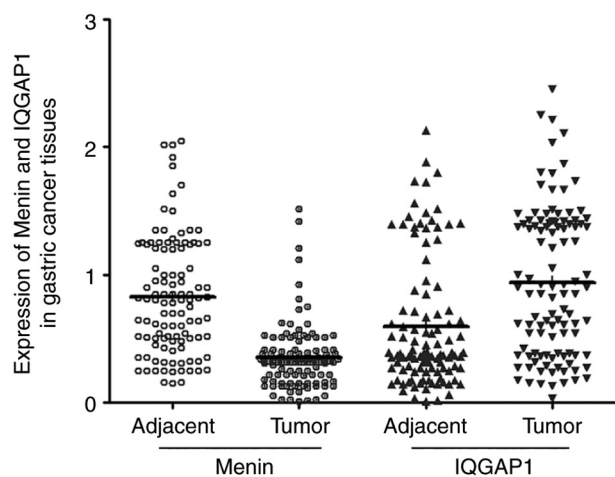

Supplement: Supplementary file 1 [file downloadSupplementary]
